# Supplementary material
Source: publisher figshare collection journal article supplement (https://scielo.figshare.com/articles/dataset/_/6504557)
Supplement: Supplementary file 1 [file Table_1.xls]

## Sheet: Table_1
<b>Emulsion type</b>	<b>Hair dye color</b>	<b>Evaluated Characteristics</b>
		Organoleptic (color)	pH	Viscosity (mPa.s<sup><b>-1</b></sup> )
LAN	Light blond	light purple color	11.07 Â± 0.07	2,200 Â± 80.13
LAN	Light brown	brownish color	10.46 Â± 0.01	1,900 Â± 102.32
CRO	Light blond	light purple color	11.20 Â± 0.01	2,000Â± 66.09
CRO	Light brown	brownish color	10.40 Â± 0.01	2,800 Â± 87.60
POL	Light blond	light purple color	10.88 Â± 0.01	1,800 Â± 106.06
POL	Light brown	brownish color	10.71 Â± 0.09	2,900 Â± 47.16
COS	Light blond	light purple color	11.18 Â± 0.01	3,200 Â± 55.47
COS	Light brown	brownish color	10.55 Â± 0.01	2,900 Â± 85.33
