# Supplementary material
Source: publisher figshare collection journal article supplement (https://scielo.figshare.com/articles/dataset/_/6504557)
Supplement: Supplementary file 2 [file Table_2.xls]

## Sheet: Table_2
<b>Gel type</b>	<b>Hair dye color</b>	<b>Evaluated Characteristics</b>
		Organoleptic (color)	pH	Viscosity (mPa.s<sup><b>-1</b></sup> )
CAR	Light blond	slightly yellow	10.57 Â± 0.01	2,530 Â± 49.33
CAR	Light brown	slightly yellow	10.26 Â± 0.03	2,060 Â± 43.66
ARI	Light blond	slightly yellow	10.51 Â± 0.02	1,820 Â± 60,00
ARI	Light brown	slightly yellow	10.47 Â± 0.01	2,290 Â± 30.35
AMI	Light blond	slightly yellow	10.88 Â± 0.01	1,600 Â± 88.00
AMI	Light brown	slightly yellow	10.38 Â± 0.04	1,680 Â± 37.16
NAT	Light blond	brownish color	10.80 Â± 0.03	1,750 Â± 18.00
NAT	Light brown	brownish color	10.40 Â± 0.02	1,800 Â± 33.85
