# Supplementary material
Source: publisher figshare collection journal article supplement (https://scielo.figshare.com/articles/dataset/_/6504557)
Supplement: Supplementary file 3 [file Table_3.xls]

## Sheet: Table_3
<b>Treatment hair dye color</b>	<b>Dark brown hair</b>
Light brown	L*	a*	b*
<i>VH</i>	15.15 Â± 0.32<sup>c</sup>	-0.48 Â± 0.13<sup>a</sup>	5.39 Â± 0.19<sup>a</sup>
<i>CRO</i>	16.37 Â± 0.49<sup>a</sup>	-1.42 Â± 0.11<sup>b,c</sup>	4.78 Â± 0.22<sup>b</sup>
<i>LAN</i>	15.56 Â± 0.18<sup>b,c</sup>	-1.14 Â± 0.34<sup>b</sup>	4.60 Â± 0.15<sup>b,c</sup>
<i>COS</i>	16.76 Â± 0.11<sup>a</sup>	-1.46 Â± 0.17<sup>b,c</sup>	4.65 Â± 0.21<sup>b,c</sup>
<i>POL</i>	16.42 Â± 0.11<sup>a</sup>	-1.37 Â± 0.12<sup>b,c</sup>	4.55 Â± 0.19<sup>b,c</sup>
<i>ARI</i>	15.45 Â± 0.19<sup>c</sup>	-1.64 Â± 0.07<sup>c</sup>	4.14 Â± 0.23<sup>c</sup>
<i>CAR</i>	16.20 Â± 0.19<sup>a</sup>	-1.35 Â± 0.16<sup>b,c</sup>	4.47 Â± 0.12<sup>b,c</sup>
<i>NAT</i>	15.26 Â± 0.07<sup>c</sup>	-1.49 Â± 0.14<sup>b,c</sup>	4.67 Â± 0.23<sup>b,c</sup>
<i>AMI</i>	16.27 Â± 0.15<sup>a</sup>	-1.82 Â± 0.10<sup>c</sup>	4.31 Â± 0.12<sup>b,c</sup>
