# Supplementary material
Source: publisher figshare collection journal article supplement (https://scielo.figshare.com/articles/dataset/_/6504557)
Supplement: Supplementary file 4 [file Table_4.xls]

## Sheet: Table_4
<b>Treatment hair dye color</b>	<b>Dark brown hair</b>
Light blond	L*	a*	b*
<i>VH</i>	15.15 Â± 0.32<sup>e</sup>	-0.48 Â± 0.13<sup>f</sup>	5.39 Â± 0.19<sup>e</sup>
<i>CRO</i>	19.93 Â± 0.13<sup>b,c</sup>	3.96 Â± 0.37<sup>c</sup>	9.59 Â± 0.43<sup>c</sup>
<i>LAN</i>	18.77 Â± 0.52<sup>d</sup>	3.67 Â± 0.03<sup>c,d</sup>	9.95 Â± 0.09<sup>b,c</sup>
<i>COS</i>	20.51 Â± 0.13Âª<sup>,b</sup>	4.02 Â± 0.10<sup>c</sup>	9.68 Â± 0.38<sup>c</sup>
<i>POL</i>	19.98 Â± 0.15<sup>b,c</sup>	3.89 Â± 0.14<sup>c</sup>	9.77 Â± 0.27<sup>b,c</sup>
<i>ARI</i>	18.88 Â± 0.16<sup>d</sup>	2.79 Â± 0.10<sup>e</sup>	8.68 Â± 0.27<sup>d</sup>
<i>CAR</i>	18.55 Â± 0.11<sup>d</sup>	3.22 Â± 0.13<sup>e</sup>	8.31 Â± 0.19<sup>d</sup>
<i>NAT</i>	19.59 Â± 0.07<sup>c</sup>	4.56 Â± 0.13<sup>b</sup>	10.52 Â± 0.27<sup>b</sup>
<i>AMI</i>	20.68 Â± 0.11Âª	5.92 Â± 0.07<sup>a</sup>	11.69 Â± 0.25<sup>a</sup>
