# Supplementary material
Source: publisher figshare collection journal article supplement (https://scielo.figshare.com/articles/dataset/_/6504557)
Supplement: Supplementary file 5 [file Table_5.xls]

## Sheet: Table_5
<b>Treatment hair dye color</b>	<b>Light Blond hair</b>
Light brown	L*	a*	b*
<i>VH</i>	68.04 Â± 0.19<sup>a</sup>	5.80 Â± 0.33<sup>a</sup>	37.02 Â± 0.36<sup>a</sup>
<i>CRO</i>	16.50 Â± 0.19<sup>c,d</sup>	-0.72 Â± 0.15<sup>b</sup>	5.89 Â± 0.37<sup>b</sup>
<i>LAN</i>	17.39 Â± 0.10<sup>b</sup>	-0.98 Â± 0.16<sup>b</sup>	5.13 Â± 0.08<sup>b</sup>
<i>COS</i>	16.00 Â± 0.13<sup>d,e</sup>	-0.93 Â± 0.15<sup>b</sup>	5.40 Â± 0.29<sup>b</sup>
<i>POL</i>	16.21 Â± 0.13<sup>c,d</sup>	-0.95 Â± 0.17<sup>b</sup>	5.45 Â± 0.18<sup>b</sup>
<i>ARI</i>	17.50 Â± 0.07<sup>b</sup>	-0.86 Â± 0.06<sup>b</sup>	5.74 Â± 0.09<sup>b</sup>
<i>CAR</i>	15.50 Â± 0.32<sup>e</sup>	-0.70 Â± 0.21<sup>b</sup>	5.66 Â± 0.40<sup>b</sup>
<i>NAT</i>	16.30 Â± 0.32<sup>c,d</sup>	-0.80 Â± 0.20<sup>b</sup>	5.23 Â± 0.25<sup>b</sup>
<i>AMI</i>	16.72 Â± 0.20<sup>c</sup>	-0.70 Â± 0.10<sup>b</sup>	5.80 Â± 0.27<sup>b</sup>
