# Supplementary material
Source: publisher figshare collection journal article supplement (https://scielo.figshare.com/articles/dataset/_/6504557)
Supplement: Supplementary file 6 [file Table_6.xls]

## Sheet: Table_6
<b>Treatment hair dye color</b>	<b>Light Blond hair</b>
Light blond	L*	a*	b*
<i>VH</i>	68.04 Â± 0.19<sup>a</sup>	5.80 Â± 0.33<sup>f</sup>	37.02 Â± 0.36<sup>e</sup>
<i>CRO</i>	61.51 Â± 0.19<sup>b</sup>	12.96 Â± 0.18<sup>e</sup>	35.69 Â± 0.37<sup>e</sup>
<i>LAN</i>	61.68 Â± 0.02<sup>b</sup>	13.24 Â± 0.04<sup>e</sup>	35.88 Â± 0.07<sup>e</sup>
<i>COS</i>	59.60 Â± 0.93<sup>c</sup>	17.04 Â± 0.67<sup>d</sup>	36.58 Â± 1.25<sup>d,e</sup>
<i>POL</i>	59.85 Â± 0.10<sup>b,c</sup>	16.54 Â± 0.42<sup>d</sup>	36.98 Â± 0.22<sup>d,e</sup>
<i>ARI</i>	58.98 Â± 0.03<sup>c</sup>	19.98 Â± 0.01<sup>c</sup>	37.76 Â± 0.05<sup>c,d</sup>
<i>CAR</i>	49.75 Â± 0.81<sup>e</sup>	22.82 Â± 0.60<sup>b</sup>	38.66 Â± 0.81<sup>b,c</sup>
<i>NAT</i>	54.00 Â± 0.75<sup>d</sup>	25.45 Â± 0.11<sup>a</sup>	42.35 Â± 0.12<sup>a</sup>
<i>AMI</i>	55.15 Â± 1.34<sup>d</sup>	22.28 Â± 0.65<sup>b</sup>	40.05 Â± 0.22<sup>b</sup>
